# Supplementary material for: Evidence for dissolved organic matter as the primary source and sink of photochemically produced hydroxyl radical in arctic surface waters
Source: Royal Society of Chemistry journal article supplement (doi:10.1039/c3em00596h), 2014-01-01
Supplement: c3em00596h.pdf [file c3em00596h.pdf]

## **Evidence for dissolved organic matter as the primary source and sink of photochemically produced hydroxyl radical in arctic surface waters**

Sarah E. Page<sup>1</sup>, J. Robert Logan<sup>1</sup>, Rose M. Cory<sup>2\*</sup>, Kristopher McNeill<sup>1\*</sup>

<sup>1</sup> Institute of Biogeochemistry and Pollutant Dynamics, Swiss Federal Institute of Technology Zurich, Zurich, Switzerland;

<sup>2</sup> Department of Earth and Environmental Sciences, University of Michigan, Ann Arbor, Michigan, USA.

Corresponding Authors' Email Addresses:

[rmcory@umich.edu](mailto:rmcory@umich.edu) and [kristopher.mcneill@env.ethz.ch](mailto:kristopher.mcneill@env.ethz.ch)

### **Supporting Information**

Pages: 6

Figures: 1

Tables: 1

**Table S1.** Sample locations, dates, measurement location, and water type.

| <b>Sample Location</b>     | <b>Sampling Date</b> | <b>Measured at Toolik<sup>a</sup></b> | <b>Water Type</b> |
|----------------------------|----------------------|---------------------------------------|-------------------|
| I Swamp Inlet              | 8-Aug-12             |                                       | Stream            |
| I Swamp Outlet             | 8-Aug-12             |                                       | Lake              |
| I1 into I3                 | 7-Aug-12             |                                       | Stream            |
| I1 Outlet                  | 7-Aug-12             |                                       | Lake              |
| I2 into I3                 | 7-Aug-12             |                                       | Stream            |
| I2 Outlet                  | 7-Aug-12             |                                       | Lake              |
| I3 Outlet                  | 7-Aug-12             |                                       | Lake              |
| I4 into I5                 | 7-Aug-12             |                                       | Stream            |
| I4 Outlet                  | 7-Aug-12             |                                       | Lake              |
| I5 into I6                 | 7-Aug-12             |                                       | Stream            |
| I5 Outlet                  | 7-Aug-12             |                                       | Lake              |
| I6 Headwaters Lake Inlet   | 7-Aug-12             |                                       | Stream            |
| I6 Headwaters Lake Outlet  | 7-Aug-12             |                                       | Lake              |
| I6 Inlet                   | 8-Aug-12             |                                       | Stream            |
| I6 Outlet                  | 8-Aug-12             |                                       | Lake              |
| I7 into I9                 | 8-Aug-12             |                                       | Stream            |
| I7 Outlet                  | 8-Aug-12             |                                       | Lake              |
| I8 Headwaters              | 7-Aug-12             |                                       | Lake              |
| I8 Inlet                   | 8-Aug-12             |                                       | Stream            |
| I8 into I9                 | 8-Aug-12             |                                       | Stream            |
| I8 Outlet                  | 8-Aug-12             |                                       | Lake              |
| Imnavait Creek Pool 2      | 2-Aug-12             |                                       | Imnavait Creek    |
| Imnavait Creek Pool 2 15cm | 13-Jul-12            | X                                     | Imnavait Creek    |
| Imnavait Creek Pool 2 90cm | 13-Jul-12            | X                                     | Imnavait Creek    |
| Imnavait Creek Weir        | 23-May-12            |                                       | Imnavait Creek    |
| Imnavait Creek Weir        | 2-Aug-12             |                                       | Imnavait Creek    |
| Imnavait Creek Weir        | 15-Aug-12            |                                       | Imnavait Creek    |
| Kuparuk River 1            | 15-Jun-12            | X                                     | River             |
| Kuparuk River 1            | 16-Jul-12            |                                       | River             |
| Kuparuk River 1            | 1-Aug-12             |                                       | River             |
| Kuparuk River 2a           | 16-Jul-12            |                                       | River             |
| Kuparuk River 2a           | 1-Aug-12             |                                       | River             |
| Kuparuk River 2a           | 15-Jun-12            | X                                     | River             |
| Kuparuk River 2b           | 1-Aug-12             |                                       | River             |
| Kuparuk River 2t           | 1-Aug-12             |                                       | River             |
| Kuparuk River 3a           | 15-Jun-12            | X                                     | River             |
| Kuparuk River 3a           | 16-Jul-12            |                                       | River             |
| Kuparuk River 3a           | 1-Aug-12             |                                       | River             |
| Kuparuk River 3b           | 1-Aug-12             |                                       | River             |
| Kuparuk River 3t           | 1-Aug-12             |                                       | River             |
| Kuparuk River 4            | 15-Jun-12            | X                                     | River             |
| Kuparuk River 4            | 16-Jul-12            |                                       | River             |

| <b>Sample Location</b>     | <b>Sampling Date</b> | <b>Measured at Toolik<sup>a</sup></b> | <b>Water Type</b>      |
|----------------------------|----------------------|---------------------------------------|------------------------|
| Kuparuk River 4            | 1-Aug-12             |                                       | River                  |
| Kuparuk River 5            | 15-Jun-12            |                                       | River                  |
| Kuparuk River 5            | 16-Jul-12            |                                       | River                  |
| Kuparuk River 5            | 1-Aug-12             |                                       | River                  |
| Kuparuk River 6            | 1-Aug-12             |                                       | River                  |
| Kuparuk River 6a           | 16-Jul-12            |                                       | River                  |
| Kuparuk River 6a           | 15-Jun-12            | X                                     | River                  |
| Kuparuk River 6b           | 1-Aug-12             |                                       | River                  |
| Kuparuk River 6t           | 1-Aug-12             |                                       | River                  |
| Kuparuk River 7            | 18-May-12            |                                       | River                  |
| Kuparuk River 7            | 22-May-12            |                                       | River                  |
| Kuparuk River 7            | 16-Jul-12            |                                       | River                  |
| Kuparuk River 7            | 1-Aug-12             |                                       | River                  |
| Kuparuk River 7            | 15-Aug-12            |                                       | River                  |
| Kuparuk River 7a           | 15-Jun-12            | X                                     | River                  |
| Kuparuk River 8a           | 16-Jul-12            |                                       | River                  |
| Kuparuk River 8a           | 1-Aug-12             |                                       | River                  |
| Kuparuk River 8a           | 15-Jun-12            | X                                     | River                  |
| Kuparuk River 8b           | 1-Aug-12             |                                       | River                  |
| Kuparuk River 8t           | 1-Aug-12             |                                       | River                  |
| Kuparuk River 9            | 15-Jun-12            |                                       | River                  |
| Kuparuk River 9            | 16-Jul-12            |                                       | River                  |
| Kuparuk River 9            | 1-Aug-12             |                                       | River                  |
| Lake 395                   | 19-Jul-12            | X                                     | Lake                   |
| Lake 395                   | 19-Jul-12            | X                                     | Lake                   |
| Lake NE14 16m              | 26-Jul-12            |                                       | Lake                   |
| Lake NE14 16m              | 9-Aug-12             |                                       | Lake                   |
| Lake NE14 3m               | 26-Jul-12            |                                       | Lake                   |
| Lake NE14 3m               | 9-Aug-12             |                                       | Lake                   |
| Lake NE14 7m               | 26-Jul-12            |                                       | Lake                   |
| Lake NE14 9m               | 9-Aug-12             |                                       | Lake                   |
| Milky Way Lower            | 8-Aug-12             |                                       | Stream                 |
| Milky Way Upper            | 8-Aug-12             |                                       | Stream                 |
| Nanushuk River             | 23-Jun-12            |                                       | River                  |
| Nanushuk River Thermokarst | 23-Jun-12            |                                       | Thermokarst Soil Water |
| Rooftop River              | 3-Jul-12             |                                       | River                  |
| Rooftop River Thermokarst  | 3-Jul-12             |                                       | Thermokarst Soil Water |
| Sagavanirktok River 1      | 1-Jul-12             | X                                     | River                  |
| Sagavanirktok River 2      | 2-Jul-12             | X                                     | River                  |
| Sagavanirktok River 3      | 2-Jul-12             | X                                     | River                  |
| Sagavanirktok River 4      | 2-Jul-12             | X                                     | River                  |
| Sagavanirktok River 5      | 18-May-12            |                                       | River                  |
| Sagavanirktok River 5      | 21-May-12            | X                                     | River                  |
| Sagavanirktok River 5      | 2-Jun-12             |                                       | River                  |

| <b>Sample Location</b> | <b>Sampling Date</b> | <b>Measured at Toolik<sup>a</sup></b> | <b>Water Type</b> |
|------------------------|----------------------|---------------------------------------|-------------------|
| Sagavanirktok River 5  | 2-Jul-12             |                                       | River             |
| Sagavanirktok River 5  | 15-Aug-12            |                                       | River             |
| Sagavanirktok River 7a | 1-Jul-12             | X                                     | River             |
| Sagavanirktok River 7b | 1-Jul-12             | X                                     | River             |
| Sagavanirktok River 7t | 1-Jul-12             | X                                     | River             |
| Sagavanirktok River 8a | 1-Jul-12             | X                                     | River             |
| Sagavanirktok River 8t | 1-Jul-12             | X                                     | River             |
| Sagavanirktok River 9a | 1-Jul-12             | X                                     | River             |
| Sagavanirktok River 9t | 1-Jul-12             | X                                     | River             |
| Toolik Lake            | 29-Jun-12            |                                       | Lake              |
| Toolik Lake 16m        | 11-May-12            | X                                     | Lake              |
| Toolik Lake 3m         | 11-May-12            | X                                     | Lake              |
| Toolik Lake 8m         | 11-May-12            | X                                     | Lake              |
| Toolik Lake Inlet      | 18-May-12            | X                                     | Stream            |
| Toolik Lake Inlet      | 19-May-12            |                                       | Stream            |
| Toolik Lake Inlet      | 21-May-12            | X                                     | Stream            |
| Toolik Lake Inlet      | 4-Jun-12             | X                                     | Stream            |
| Toolik Lake Inlet      | 8-Aug-12             |                                       | Stream            |
| Toolik Lake Outlet     | 4-Jun-12             | X                                     | Lake              |

<sup>a</sup> All other samples measured at ETH Zurich.

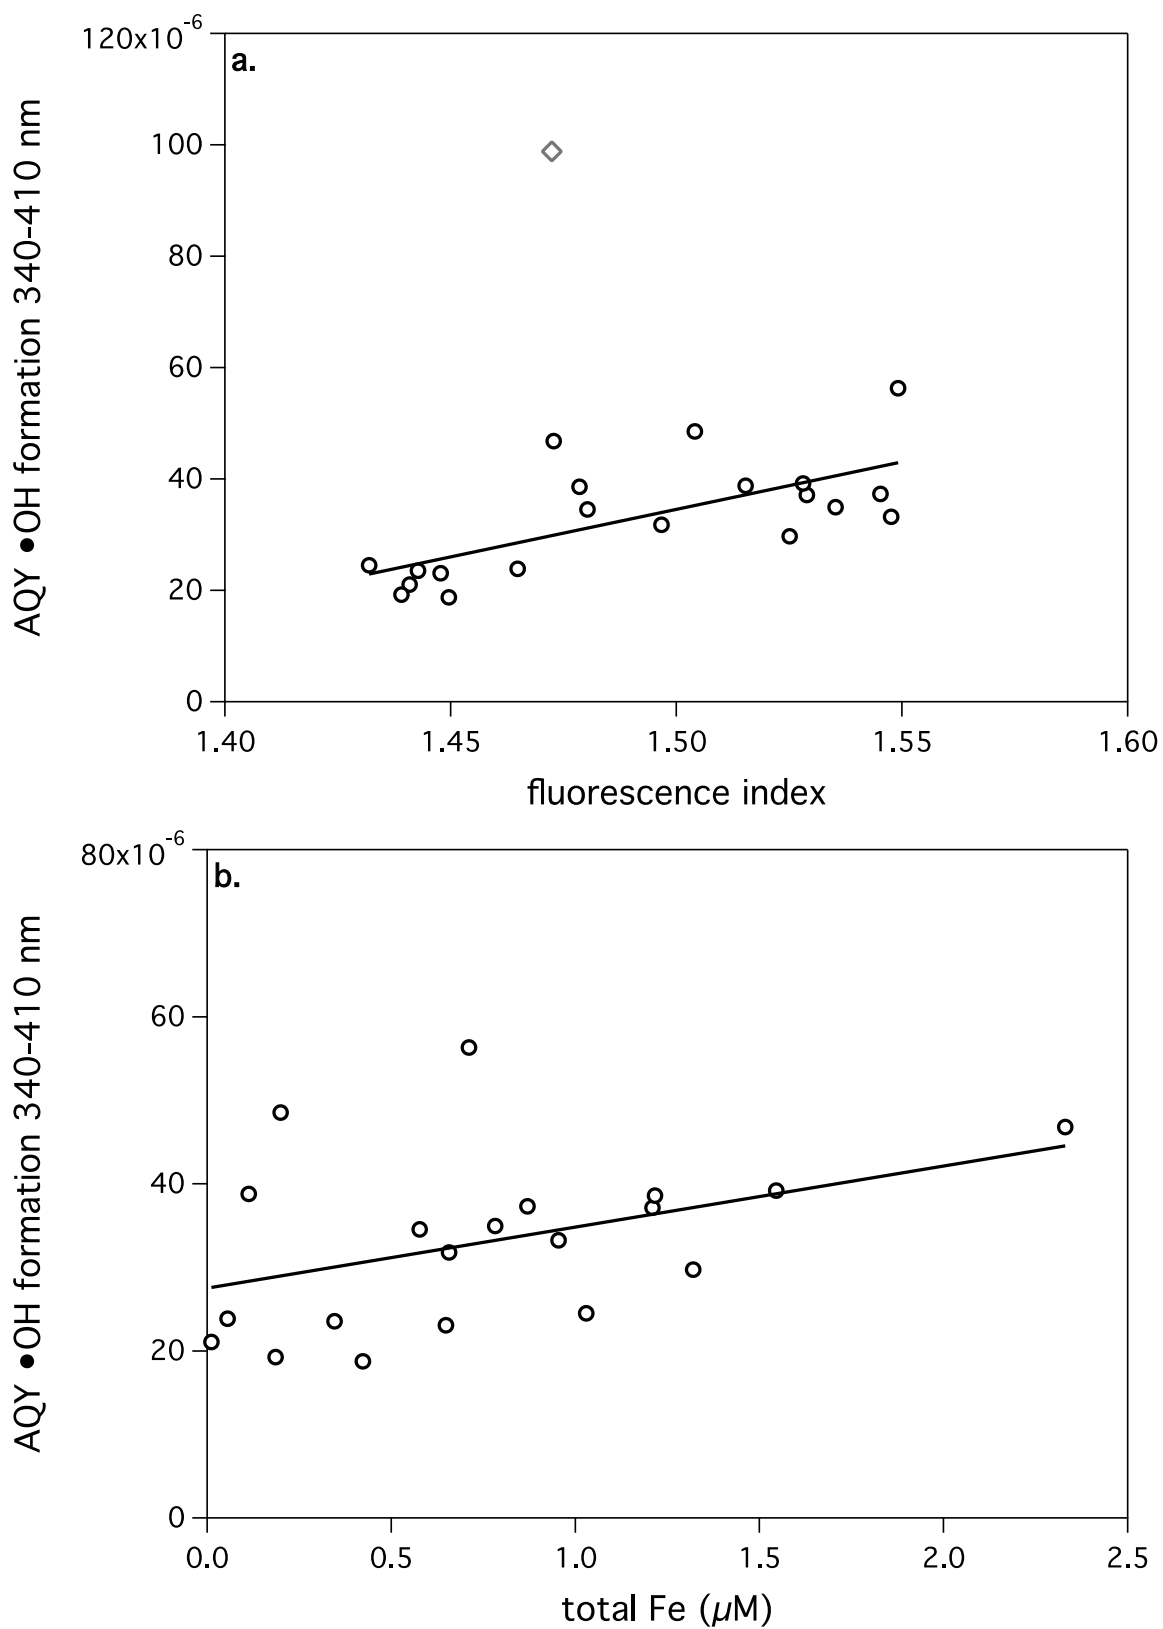

**Figure S1.** Scatter plots showing correlations between the apparent quantum yield of  $\bullet\text{OH}$  formation versus a measure of DOM quality, fluorescence index (a), and total Fe (b) as measured for the Inlet Series (I-series). The sample from the I-6 Inlet is marked in a grey

diamond and was not included in the correlation determinations, and all other measurements are designated by dark circles. Fit parameters are as follows: (a)  $R^2 = 0.5$ ,  $n=20$  and (b)  $R^2 = 0.2$ ,  $n=20$ .
